# Supplementary material
Source: PubMed Central journal article supplement (PMC5967669)

**SUPPLEMENTAL MATERIAL**

**SUPPLEMENTAL TABLES**

**Table S1.** Number of events and event rate by baseline dialysis stdKt/V category among patients undergoing home hemodialysis (n = 2,373) and in-center hemodialysis (n = 109,273).

|                               | StdKt/V  | Mortality |                                  | Hospitalization |                                  | Transfer to in-center hemodialysis |                                  |
|-------------------------------|----------|-----------|----------------------------------|-----------------|----------------------------------|------------------------------------|----------------------------------|
|                               |          | Events    | Crude rate (95% CI) <sup>a</sup> | Events          | Crude rate (95% CI) <sup>a</sup> | Events                             | Crude rate (95% CI) <sup>a</sup> |
| <b>Home hemodialysis</b>      | <2.1     | 86        | 6.8 (5.4, 8.2)                   | 587             | 68.6 (63.0, 74.2)                | 184                                | 14.5 (12.4, 16.6)                |
|                               | 2.1-<2.3 | 38        | 7.0 (4.7, 9.2)                   | 230             | 65.9 (57.4, 74.5)                | 67                                 | 12.3 (9.3, 15.2)                 |
|                               | ≥2.3     | 58        | 8.0 (5.9, 10.0)                  | 321             | 67.7 (60.3, 75.1)                | 102                                | 14.0 (11.3, 16.8)                |
|                               |          |           |                                  |                 |                                  |                                    |                                  |
| <b>In-center hemodialysis</b> | <2.1     | 7287      | 14.9 (14.6, 15.3)                | 21,356          | 105.9 (104.4, 107.3)             | -                                  | -                                |
|                               | 2.1-<2.3 | 7733      | 15.1 (14.8, 15.4)                | 21,476          | 99.1 (97.8, 100.5)               | -                                  | -                                |
|                               | ≥2.3     | 13502     | 16.0 (15.7, 16.3)                | 36,994          | 108.7 (107.6, 109.8)             | -                                  | -                                |

<sup>a</sup> Rates per 100 person-years

**Table S2.** Restricted cohort: Number of events and event rate by baseline dialysis stdKt/V category among patients undergoing home hemodialysis (n = 2,373) and in-center hemodialysis (n = 109,273), stratified by availability of data for residual kidney function.

**Home hemodialysis**

|                                                     | StdKt/V  | Mortality |                                  | Hospitalization |                                  | Transfer to in-center hemodialysis |                                  |
|-----------------------------------------------------|----------|-----------|----------------------------------|-----------------|----------------------------------|------------------------------------|----------------------------------|
|                                                     |          | Events    | Crude rate (95% CI) <sup>a</sup> | Events          | Crude rate (95% CI) <sup>a</sup> | Events                             | Crude rate (95% CI) <sup>a</sup> |
| <b>Residual Kidney Function Data (N = 347)</b>      | <2.1     | 6         | 2.7 (0.5, 4.8)                   | 88              | 49.2 (38.9, 59.5)                | 25                                 | 11.1 (6.8, 15.5)                 |
|                                                     | 2.1-<2.3 | 3         | 6.4 (0.0, 13.7)                  | 20              | 52.9 (29.7, 76.1)                | 5                                  | 10.7 (1.3, 20.2)                 |
|                                                     | ≥2.3     | 1         | 2.0 (0.0, 6.0)                   | 17              | 44.4 (23.3, 65.5)                | 6                                  | 12.2 (2.4, 22.0)                 |
| <b>No Residual Kidney Function Data (N = 2,026)</b> | <2.1     | 80        | 7.7 (6.0, 9.4)                   | 499             | 73.7 (67.2, 80.2)                | 159                                | 15.3 (12.9, 17.7)                |
|                                                     | 2.1-<2.3 | 35        | 7.0 (4.7, 9.3)                   | 210             | 67.5 (58.4, 76.7)                | 62                                 | 12.4 (9.3, 15.5)                 |
|                                                     | ≥2.3     | 57        | 8.4 (6.2, 10.6)                  | 304             | 69.7 (61.9, 77.6)                | 96                                 | 14.2 (11.3, 17.0)                |

<sup>a</sup> Rates per 100 person-years

**In-center Hemodialysis**

|                                                      | StdKt/V  | Mortality |                                  | Hospitalization |                                  |
|------------------------------------------------------|----------|-----------|----------------------------------|-----------------|----------------------------------|
|                                                      |          | Events    | Crude rate (95% CI) <sup>a</sup> | Events          | Crude rate (95% CI) <sup>a</sup> |
| <b>Residual Kidney Function Data (N = 31,748)</b>    | <2.1     | 2681      | 12.6 (12.1, 13.1)                | 8593            | 87.1 (85.3, 89.0)                |
|                                                      | 2.1-<2.3 | 2251      | 13.5 (12.9, 14.1)                | 6613            | 86.1 (84.1, 88.2)                |
|                                                      | ≥2.3     | 2317      | 14.1 (13.6, 14.7)                | 6890            | 94.9 (92.7, 97.1)                |
| <b>No Residual Kidney Function Data (N = 77,525)</b> | <2.1     | 4606      | 16.7 (16.2, 17.2)                | 12763           | 123.8 (121.7, 126.0)             |
|                                                      | 2.1-<2.3 | 5482      | 15.9 (15.5, 16.3)                | 14863           | 106.3 (104.6, 108.0)             |
|                                                      | ≥2.3     | 11185     | 16.5 (16.2, 16.8)                | 30104           | 112.4 (111.2, 113.7)             |

<sup>a</sup> Rates per 100 person-years

Supplemental material is neither peer-reviewed nor thoroughly edited by CJASN. The authors alone are responsible for the accuracy and presentation of the material.

**Table S3.** Baseline characteristics of patients ever treated with in-center hemodialysis, stratified by presence or absence of data on residual kidney function.

|                                       |           | <b>Residual Kidney<br/>Function Data</b> | <b>No Residual Kidney<br/>Function Data</b> |
|---------------------------------------|-----------|------------------------------------------|---------------------------------------------|
| <i>n</i>                              | 109,273   | 31,748                                   | 77,525                                      |
| Age                                   | 63 ± 15   | 62±15                                    | 63±15                                       |
| Sex (% female)                        | 43        | 36                                       | 46                                          |
| Body mass index (kg/m <sup>2</sup> )  | 28 ± 7    | 29.02±7.53                               | 27.78±7.22                                  |
| Weekly treatment frequency            | 3 (3, 3)  | 3 (3, 3)                                 | 3 (3, 3)                                    |
| Mean treatment time (minutes)         | 212 ± 23  | 208±24                                   | 213±23                                      |
| Weekly interdialytic weight gain (kg) | 5.7 ± 2.9 | 6±3                                      | 6±3                                         |
| <b>Race (%)</b>                       |           |                                          |                                             |
| White                                 | 47        | 55                                       | 44                                          |
| Black                                 | 31        | 27                                       | 33                                          |
| Asian                                 | 3         | 4                                        | 3                                           |
| Hispanic                              | 15        | 11                                       | 16                                          |
| Other                                 | 4         | 4                                        | 4                                           |
| <b>Primary Insurance (%)</b>          |           |                                          |                                             |
| Medicare                              | 54        | 51                                       | 55                                          |
| Medicaid                              | 6         | 6                                        | 7                                           |
| Other Insurance                       | 40        | 43                                       | 38                                          |
| <b>Access Type (%)</b>                |           |                                          |                                             |
| CVC                                   | 78        | 76                                       | 79                                          |
| AV Fistula                            | 15        | 18                                       | 14                                          |
| AV Graft                              | 4         | 4                                        | 4                                           |
| Unknown                               | 3         | 2                                        | 3                                           |
| <b>Facility Region (%)</b>            |           |                                          |                                             |
| Northeast                             | 13        | 10                                       | 14                                          |
| Midwest                               | 18        | 22                                       | 17                                          |
| South                                 | 43        | 39                                       | 44                                          |
| West                                  | 25        | 27                                       | 24                                          |
| <b>Coexisting Illnesses (%)</b>       |           |                                          |                                             |
| Diabetes                              | 58        | 59                                       | 58                                          |
| Hypertension                          | 51        | 50                                       | 52                                          |
| Atherosclerotic heart disease         | 14        | 14                                       | 15                                          |
| Congestive heart failure              | 37        | 38                                       | 37                                          |
| Other cardiovascular disease          | 15        | 15                                       | 15                                          |
| Cerebrovascular disease               | 2         | 2                                        | 2                                           |
| Chronic obstructive pulmonary disease | 5         | 5                                        | 5                                           |
| History of malignancy                 | 2         | 2                                        | 2                                           |

Supplemental material is neither peer-reviewed nor thoroughly edited by CJASN. The authors alone are responsible for the accuracy and presentation of the material.

| <b>IV Medications</b>               |                            |                            |                            |
|-------------------------------------|----------------------------|----------------------------|----------------------------|
| Iron (median monthly dose)          | 333 (150, 483)             | 367 (183, 533)             | 333 (133, 467)             |
| ESA (median weekly dose)            | 26,400<br>(16,500, 36,300) | 26,400<br>(16,500, 36,300) | 26,400<br>(16,200, 36,300) |
| <b>Laboratory Data</b>              |                            |                            |                            |
| Albumin (g/dl)                      | 3.5 ± 0.5                  | 3.57±0.46                  | 3.49±0.48                  |
| Creatinine (mg/dl)                  | 5.9 ± 2.4                  | 5.85±2.35                  | 5.88±2.36                  |
| Potassium (mEq/L)                   | 4.4 ± 0.5                  | 4.43±0.49                  | 4.41±0.52                  |
| Sodium (mEq/L)                      | 138 ± 3                    | 138.21±2.92                | 138.16±3.07                |
| Bicarbonate (mg/dl)                 | 24 ± 3                     | 23.46±2.62                 | 23.65±2.7                  |
| Hemoglobin (g/dL)                   | 11.1 ± 1.2                 | 11.26±1.11                 | 11.07±1.19                 |
| Ferritin (ng/mL)                    | 282 (164, 481)             | 267 (156, 447)             | 289 (168, 497)             |
| Total iron binding capacity (mg/dl) | 225 ± 49                   | 232.11±47.11               | 222.63±49.17               |
| Iron Saturation (%)                 | 23 ± 9                     | 22.63±8.36                 | 23.23±9.19                 |
| Calcium (mg/dl)                     | 9.1 ± 0.6                  | 9.07±0.54                  | 9.11±0.57                  |
| Phosphorus (mg/dl)                  | 4.9 ± 1.1                  | 4.99±1.12                  | 4.9±1.15                   |
| Intact Parathyroid Hormone (pg/mL)  | 314 (198, 486)             | 312 (202, 478)             | 315 (197, 490)             |
| Alkaline Phosphatase (U/L)          | 87 (69, 115)               | 84 (67, 110)               | 88 (70, 116)               |
| WBC (x10 <sup>3</sup> /μl)          | 7.8 ± 2.7                  | 7.76±2.62                  | 7.82±2.66                  |
| Lymphocytes, % of total WBCs        | 21 ± 8                     | 20.68±7.46                 | 20.7±7.5                   |

Abbreviations: CVC, central venous catheter; AV, arteriovenous; IV, intravenous; ESA, erythropoiesis stimulating agent; WBC, white blood cells

Data presented as mean ± SD, median (interquartile range), or percentage. Values presented are from the first 91-day period after initiation of in-center hemodialysis

**Table S4.** Restricted Cohort: Associations of dialysis and renal stdKt/V with clinical outcomes in patients with available data on residual kidney function treated with in-center hemodialysis (N = 31,748)

|                         | StdKt/V  | Hazards Ratio (95% Confidence Interval) |                                 |                             |                      |                                 |                             |
|-------------------------|----------|-----------------------------------------|---------------------------------|-----------------------------|----------------------|---------------------------------|-----------------------------|
|                         |          | Mortality                               |                                 |                             | Hospitalization      |                                 |                             |
|                         |          | Unadjusted                              | Minimally Adjusted <sup>a</sup> | Fully Adjusted <sup>b</sup> | Unadjusted           | Minimally Adjusted <sup>a</sup> | Fully Adjusted <sup>b</sup> |
| <b>Dialysis StdKt/V</b> | <2.1     | 0.95<br>(0.91, 1.02)                    | 1.04<br>(0.98, 1.10)            | 1.07<br>(1.01, 1.14)        | 1.03<br>(0.99, 1.06) | 1.05<br>(1.02, 1.09)            | 1.08<br>(1.04, 1.11)        |
|                         | 2.1-<2.3 | Reference                               | Reference                       | Reference                   | Reference            | Reference                       | Reference                   |
|                         | ≥2.3     | 1.04<br>(0.98, 1.10)                    | 0.99<br>(0.94, 1.05)            | 0.95<br>(0.89, 1.01)        | 1.08<br>(1.04, 1.11) | 1.04<br>(1.01, 1.08)            | 1.02<br>(0.98, 1.06)        |
|                         |          |                                         |                                 |                             |                      |                                 |                             |
| <b>Renal StdKt/V</b>    | <0.5     | 1.21<br>(1.15, 1.28)                    | 1.29<br>(1.22, 1.36)            | 1.23<br>(1.16, 1.30)        | 1.09<br>(1.05, 1.12) | 1.10<br>(1.06, 1.13)            | 1.05<br>(1.02, 1.09)        |
|                         | 0.5-<1.0 | Reference                               | Reference                       | Reference                   | Reference            | Reference                       | Reference                   |
|                         | ≥1.0     | 0.95<br>(0.89, 1.01)                    | 0.91<br>(0.86, 0.97)            | 0.94<br>(0.88, 0.99)        | 0.96<br>(0.92, 0.99) | 0.95<br>(0.92, 0.98)            | 0.97<br>(0.94, 1.0)         |

<sup>a</sup> Data adjusted for age, sex, and race/ethnicity

<sup>b</sup> Data adjusted for demographic characteristics above, plus body mass index, diabetes status, history of congestive heart failure, history of atherosclerotic heart disease, serum albumin, and vascular access type. Additionally, minimally adjusted and fully adjusted dialysis stdKt/V models are adjusted for renal stdKt/V. Minimally adjusted and fully adjusted renal stdKt/V models are adjusted for dialysis stdKt/V.

**Table S5.** Sensitivity Analysis: Associations of quintiles of baseline stdKt/V with clinical outcomes in patients treated with home hemodialysis

| <b>Outcome</b>                     | <b>StdKt/V Quintile</b> | <b>Number of Patients</b> | <b>Number of Events</b> | <b>Hazard Ratio</b> | <b>95% CI</b> |
|------------------------------------|-------------------------|---------------------------|-------------------------|---------------------|---------------|
| Mortality                          | <1.76                   | 442                       | 33                      | 0.87                | 0.54, 1.39    |
|                                    | 1.76-<1.99              | 442                       | 33                      | 0.94                | 0.59, 1.51    |
|                                    | 1.99-<2.18              | 432                       | 42                      | Reference           | Reference     |
|                                    | 2.18-<2.41              | 421                       | 53                      | 1.2                 | 0.79, 1.83    |
|                                    | >2.41                   | 430                       | 45                      | 1.02                | 0.66, 1.58    |
| Hospitalization                    | <1.76                   | 442                       | 248                     | 1.18                | 0.97, 1.41    |
|                                    | 1.76-<1.99              | 442                       | 238                     | 1.15                | 0.96, 1.39    |
|                                    | 1.99-<2.18              | 432                       | 224                     | Reference           | Reference     |
|                                    | 2.18-<2.41              | 421                       | 232                     | 1.05                | 0.87, 1.27    |
|                                    | >2.41                   | 430                       | 240                     | 1.04                | 0.87, 1.26    |
| Transfer to In-Center Hemodialysis | <1.76                   | 442                       | 84                      | 1.24                | 0.89, 1.73    |
|                                    | 1.76-<1.99              | 442                       | 79                      | 1.24                | 0.89, 1.73    |
|                                    | 1.99-<2.18              | 432                       | 66                      | Reference           | Reference     |
|                                    | 2.18-<2.41              | 421                       | 70                      | 1.04                | 0.74, 1.46    |
|                                    | >2.41                   | 430                       | 80                      | 1.15                | 0.83, 1.60    |

Data adjusted for age, sex, race/ethnicity, body mass index, coexisting diabetes, history of congestive heart failure, history of atherosclerotic heart disease, serum albumin, and vascular access type

**Table S6.** Sensitivity Analysis: Associations of baseline stdKt/V with clinical outcomes in patients treated with home hemodialysis, modeling stdKt/V as a binary exposure.

**A. StdKt/V <2.1 versus ≥ 2.1**

| Outcome                            | StdKt/V category | Number of Patients | Number of Events | Adjusted Hazard Ratio <sup>a</sup> | 95% CI     |
|------------------------------------|------------------|--------------------|------------------|------------------------------------|------------|
| All-cause Mortality                | <2.1             | 1221               | 96               | 0.98                               | 0.74, 1.31 |
|                                    | ≥ 2.1            | 1152               | 110              | Reference                          | Reference  |
| Hospitalization                    | <2.1             | 1221               | 611              | 1.07                               | 0.95, 1.20 |
|                                    | ≥ 2.1            | 1152               | 571              | Reference                          | Reference  |
| Transfer to in-center hemodialysis | <2.1             | 1221               | 202              | 1.15                               | 0.93, 1.41 |
|                                    | ≥ 2.1            | 1152               | 177              | Reference                          | Reference  |

<sup>a</sup> Hazard ratio estimates adjusted for age, sex, race/ethnicity, BMI, coexisting diabetes, history of CHF, history of atherosclerotic heart disease, serum albumin, and vascular access type

**B. StdKt/V <2.3 versus ≥ 2.3**

| Outcome                            | StdKt/V category | Number of Patients | Number of Events | Adjusted Hazard Ratio <sup>a</sup> | 95% CI     |
|------------------------------------|------------------|--------------------|------------------|------------------------------------|------------|
| All-cause Mortality                | <2.3             | 1717               | 142              | 0.94                               | 0.69, 1.28 |
|                                    | ≥ 2.3            | 656                | 64               | Reference                          | Reference  |
| Hospitalization                    | <2.3             | 1717               | 849              | 1.03                               | 0.89, 1.17 |
|                                    | ≥ 2.3            | 656                | 333              | Reference                          | Reference  |
| Transfer to in-center hemodialysis | <2.3             | 1717               | 273              | 1.01                               | 0.80, 1.28 |
|                                    | ≥ 2.3            | 656                | 106              | Reference                          | Reference  |

<sup>a</sup> Hazard ratio estimates adjusted for age, sex, race/ethnicity, BMI, coexisting diabetes, history of CHF, history of atherosclerotic heart disease, serum albumin, and vascular access type

Supplemental material is neither peer-reviewed nor thoroughly edited by CJASN. The authors alone are responsible for the accuracy and presentation of the material.

**Table S7.** Sensitivity analysis: Associations of time-varying stdKt/V with clinical outcomes in patients treated with home hemodialysis and in-center hemodialysis.

|                               | StdKt/V     | Hazard Ratio (95% Confidence Interval) |                      |                                    |
|-------------------------------|-------------|----------------------------------------|----------------------|------------------------------------|
|                               |             | All-cause mortality                    | Hospitalization      | Transfer to In-Center Hemodialysis |
| <b>Home hemodialysis</b>      | <2.1        | 1.24<br>(0.82, 1.88)                   | 1.13<br>(0.96, 1.32) | 1.25<br>(0.94, 1.67)               |
|                               | 2.1-<2.3    | Reference                              | Reference            | Reference                          |
|                               | ≥2.3        | 1.44<br>(0.95, 2.21)                   | 1.05<br>(0.89, 1.25) | 0.97<br>(0.71, 1.34)               |
|                               |             |                                        |                      |                                    |
| <b>In-Center hemodialysis</b> | <2.1        | 1.36<br>(1.31, 1.41)                   | 1.19<br>(1.16, 1.21) | -                                  |
|                               | 2.1 to <2.3 | Reference                              | Reference            | -                                  |
|                               | ≥ 2.3       | 0.89<br>(0.87, 0.92)                   | 0.94<br>(0.93, 0.96) | -                                  |

Data adjusted for age, sex, race/ethnicity, body mass index, coexisting diabetes, history of congestive heart failure, history of atherosclerotic heart disease, serum albumin, and vascular access type



## SUPPLEMENTAL FIGURES

FIGURE S1. Construction of study cohort.

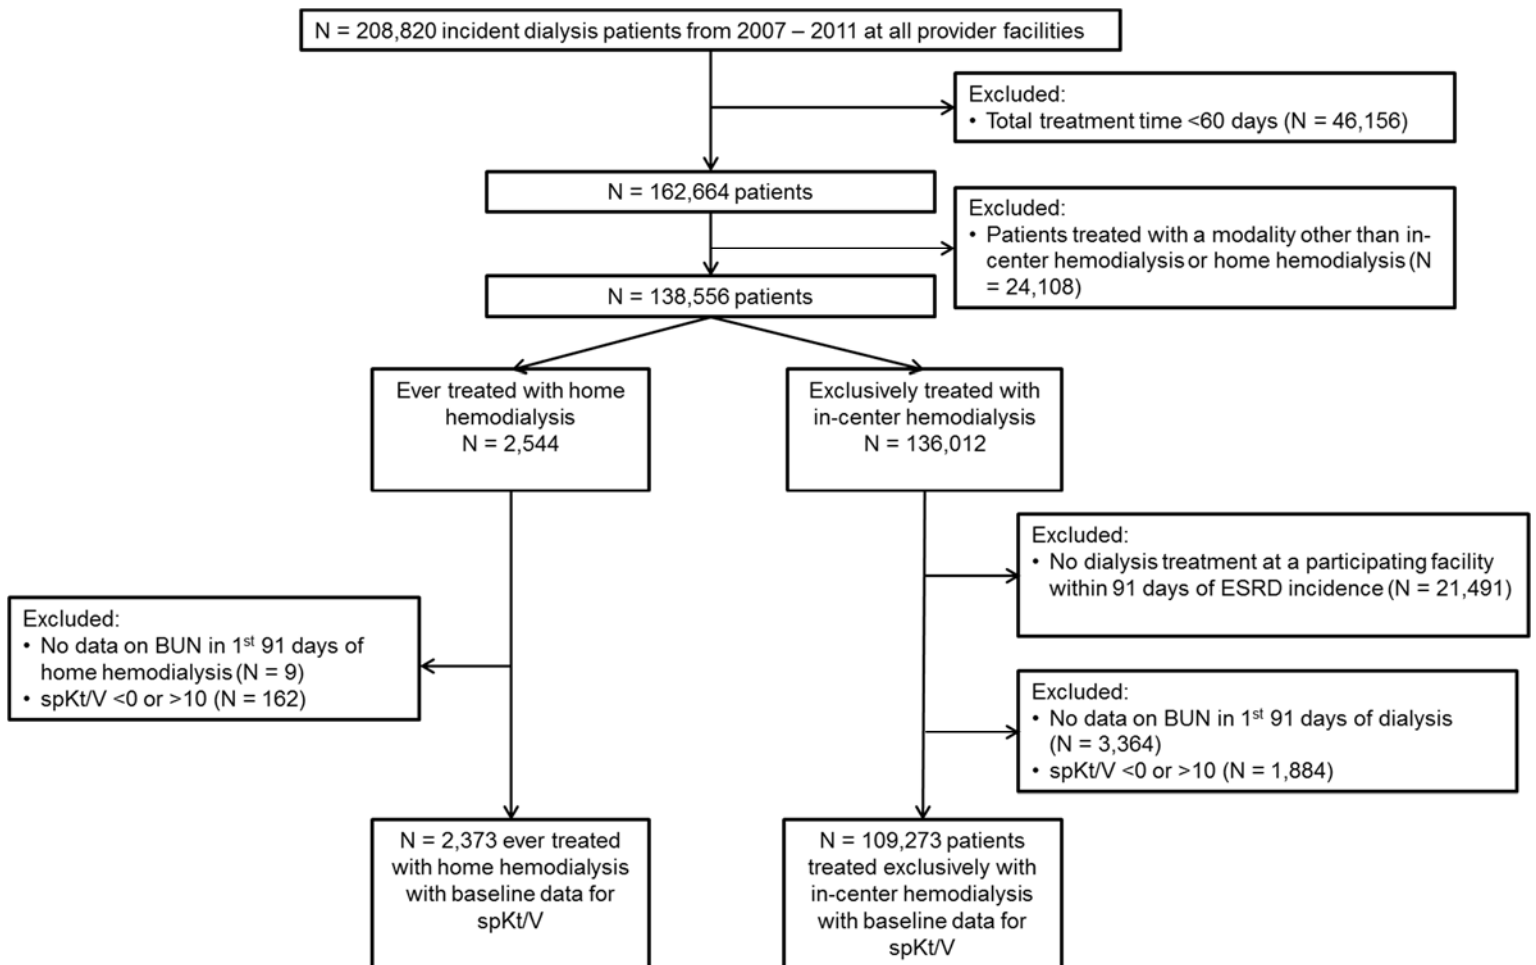

Supplement: CJN.05680517SupplementaryData.pdf [file CJN.05680517SupplementaryData.pdf]
